# Supplementary material for: The hepatic and skeletal muscle ovine metabolomes as affected by weight loss: a study in three sheep breeds using NMR-metabolomics
Source: PubMed Central journal article supplement (PMC5155430; doi:10.1038/srep39120), 2016-12-14
Supplement: srep39120-s1.pdf [file srep39120-s1.pdf]

**The hepatic and skeletal muscle ovine metabolomes as affected by weight loss: a study in three sheep breeds using NMR-metabolomics**

Mariana Palma<sup>1</sup>, Tim Scanlon<sup>2</sup>, Tanya Kilminster<sup>2</sup>, John Milton<sup>3</sup>, Chris Oldham<sup>2</sup>, Johan Greeff<sup>2</sup>, Manolis Matzapetakis<sup>1</sup>, André M. Almeida<sup>4,5</sup>

<sup>1</sup>ITQB NOVA, Instituto de Tecnologia Química e Biológica António Xavier, Universidade Nova de Lisboa, Oeiras, Portugal

<sup>2</sup>DAFWA – Department of Agriculture and Food Western Australia, Perth, WA, Australia

<sup>3</sup>UWA – University of Western Australia, Perth, WA, Australia

<sup>4</sup>IBET – Instituto de Biologia Experimental e Tecnológica, Oeiras, Portugal

<sup>5</sup>RUSVM – Ross University School of Veterinary Medicine, Basseterre, St. Kitts and Nevis (West Indies)

**Supplementary Figure S1.** Multivariate analysis of gastrocnemius muscle (aqueous fraction) metabolites concentration. (A) PCA scores plot for all the experimental groups (NC = 5, PC1 = 38.4 %, PC2 = 8.39 %); (B) PCA scores plot for the three restricted groups (NC = 4, PC1 = 38.2 %, PC2 = 10.5 %); (C) PLS scores plot of Damara growth and restricted groups (NC = 2,  $R^2=0.346$ ,  $Q^2=0.580$ ,  $p_{CV-ANOVA} = 0.0063$ ); (D) Permutation test of the PLS obtained from the Damara growth and restricted groups (100 permutations; Intercepts:  $R^2=(0.0, 0.588)$ ;  $Q^2=(0.0, -0.244)$ ); (E) PLS scores plot of Dorper growth and restricted groups (NC = 3,  $R^2=0.602$ ,  $Q^2=0.232$ ,  $p_{CV-ANOVA} = 1$ ); (F) Permutation test of the PLS obtained from the Dorper growth and restricted groups (100 permutations; Intercepts:  $R^2=(0.0, 0.743)$ ;  $Q^2=(0.0, -0.0635)$ ).

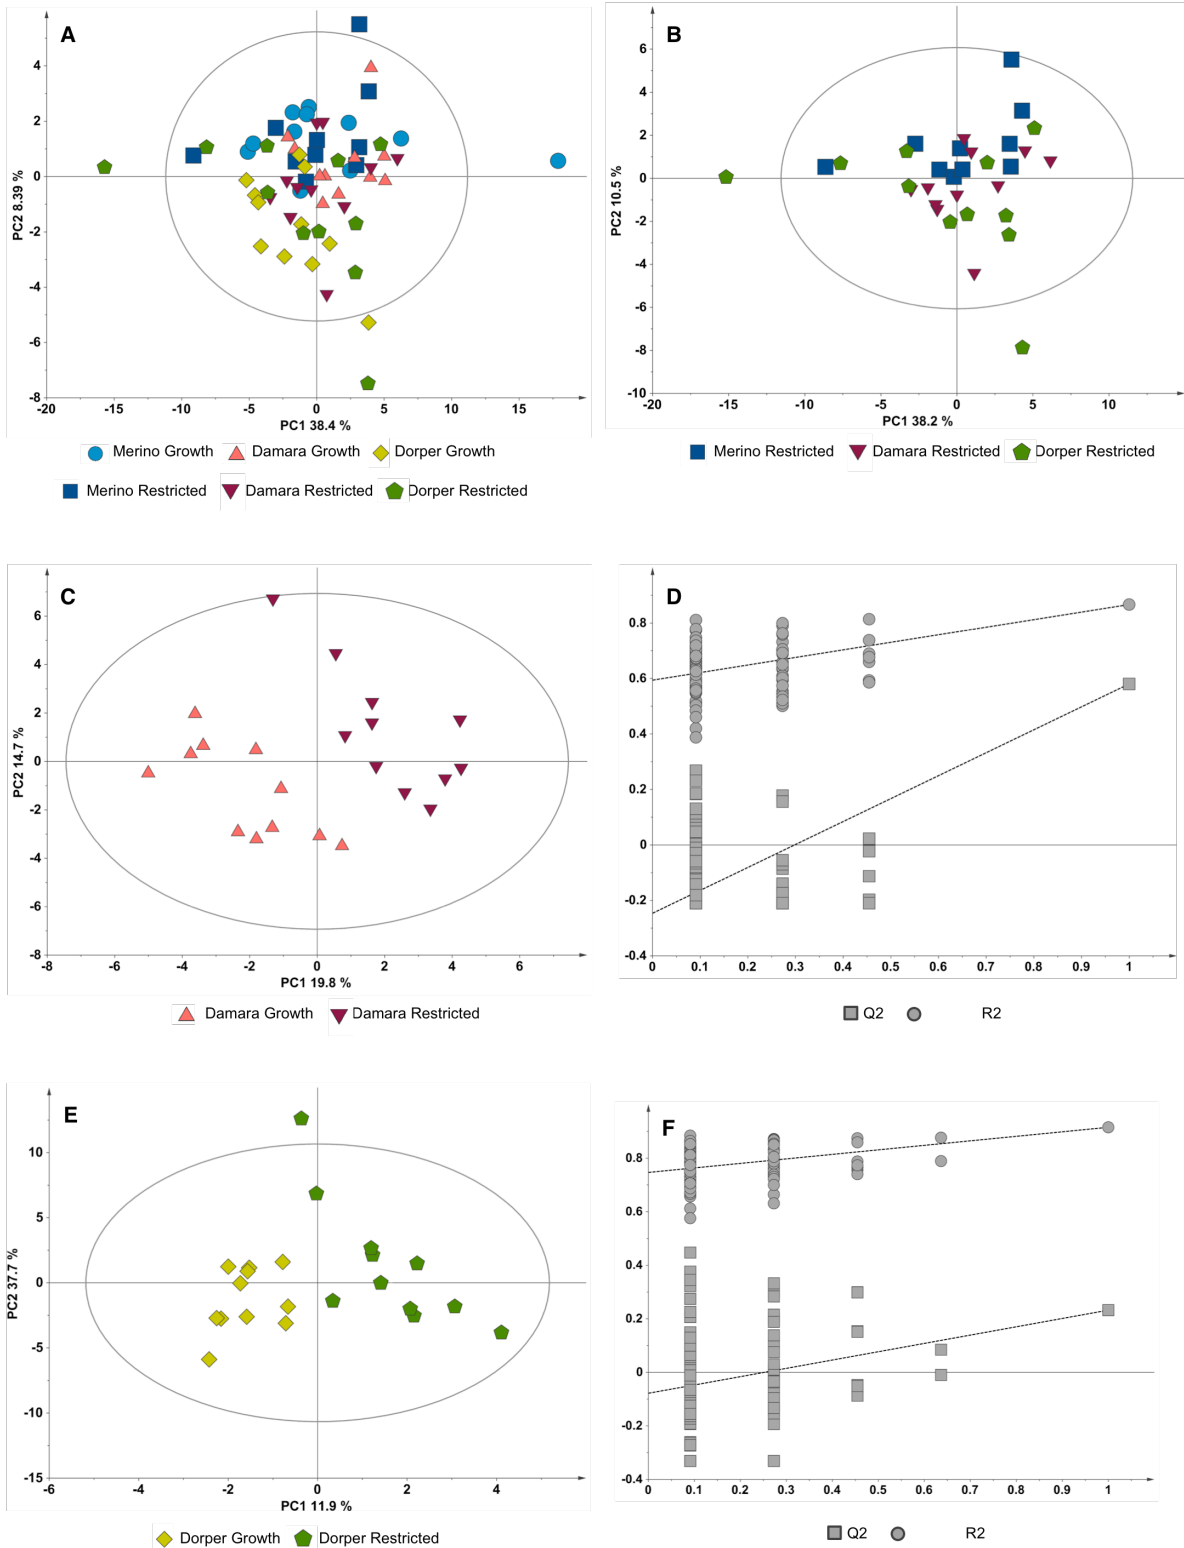

**Supplementary Figure S2.** Multivariate analysis of gastrocnemius liver (aqueous fraction) metabolites concentration. (A) PLS scores plot of Dorper growth and restricted groups (NC = 3,  $R^2 = 0.697$ ,  $Q^2 = 0.535$ ,  $p_{CV-ANOVA} = 0.022$ ); (B) Permutation test of the PLS obtained from the Dorper growth and restricted groups (100 permutations; Intercepts:  $R^2 = (0.0, 0.661)$ ;  $Q^2 = (0.0, -0.0199)$ ).

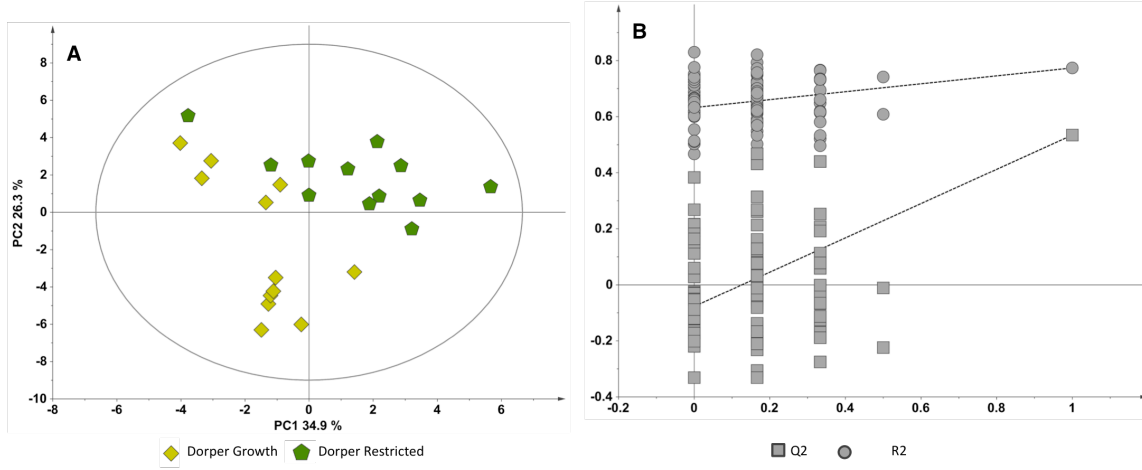

**Supplementary Table S1.** Identified metabolites in gastrocnemius muscle of Merino, Dorper and Damara sheep breeds (growth and restricted groups). Average concentration (mmol/ g tissue) and standard deviation are shown for each experimental group.

|                                  | Merino                 |                         | Dorper                 |                         | Damara                 |                         |
|----------------------------------|------------------------|-------------------------|------------------------|-------------------------|------------------------|-------------------------|
|                                  | growth                 | restricted              | growth                 | restricted              | growth                 | restricted              |
| 3-Methylhistidine                | 2.23E-05<br>± 1.82E-05 | 2.76E-05<br>± 2.98E-05  | 7.08E-06<br>± 3.36E-06 | 6.36E-06<br>± 4.28E-06  | 1.19E-05<br>± 3.33E-06 | 1.49E-05<br>± 1.91E-05  |
| β-Alanine                        | 1.21E-04<br>± 4.02E-05 | 1.05E-04<br>± 2.58E-05  | 1.00E-04<br>± 5.65E-05 | 1.06E-04<br>± 5.50E-05  | 1.20E-04<br>± 5.31E-05 | 9.21E-05<br>± 3.78E-05  |
| Acetate                          | 8.96E-05<br>± 3.04E-05 | 5.31E-05<br>± 2.18E-05  | 6.04E-05<br>± 1.37E-05 | 6.58E-05<br>± 3.16E-05  | 6.95E-05<br>± 1.49E-05 | 6.98E-05<br>± 1.14E-05  |
| Acetyl-L-carnitine <sup>a</sup>  | 2.57E-03<br>± 1.23E-03 | 4.58E-03*<br>± 1.94E-03 | 1.64E-03<br>± 5.76E-04 | 1.59E-03<br>± 1.03E-03  | 2.20E-03<br>± 3.79E-04 | 2.17E-03<br>± 7.57E-04  |
| Adenine <sup>a</sup>             | 8.29E-05<br>± 7.53E-05 | 7.22E-05<br>± 4.99E-05  | 2.08E-05<br>± 1.07E-05 | 5.26E-05*<br>± 4.11E-05 | 8.46E-05<br>± 4.29E-05 | 7.35E-05<br>± 6.46E-05  |
| Adenosine                        | 7.30E-06<br>± 4.27E-06 | 7.68E-06<br>± 1.75E-06  | 7.27E-06<br>± 2.35E-06 | 5.84E-06<br>± 3.65E-06  | 6.96E-06<br>± 1.33E-06 | 6.63E-06<br>± 2.54E-06  |
| ADP/ AMP/ ATP                    | 7.45E-04<br>± 5.27E-04 | 8.81E-04<br>± 4.55E-04  | 1.32E-03<br>± 7.84E-04 | 1.07E-03<br>± 9.58E-04  | 9.43E-04<br>± 4.66E-04 | 1.29E-03<br>± 6.91E-04  |
| Alanine                          | 2.36E-03<br>± 1.17E-03 | 2.23E-03<br>± 9.02E-04  | 1.62E-03<br>± 7.56E-04 | 1.80E-03<br>± 1.22E-03  | 3.19E-03<br>± 1.12E-03 | 2.50E-03<br>± 1.01E-03  |
| Anserine                         | 5.11E-03<br>± 2.49E-03 | 4.46E-03<br>± 2.13E-03  | 5.48E-03<br>± 1.49E-03 | 5.42E-03<br>± 3.08E-03  | 6.14E-03<br>± 1.09E-03 | 6.66E-03<br>± 1.58E-03  |
| Aspartate                        | 1.50E-04<br>± 8.45E-05 | 1.29E-04<br>± 6.25E-05  | 1.22E-04<br>± 4.38E-05 | 1.75E-04<br>± 1.23E-04  | 1.44E-04<br>± 4.81E-05 | 1.61E-04<br>± 5.43E-05  |
| Betaine                          | 1.54E-03<br>± 5.48E-04 | 1.61E-03<br>± 4.12E-04  | 8.75E-04<br>± 2.80E-04 | 8.02E-04<br>± 5.61E-04  | 9.88E-04<br>± 2.44E-04 | 1.17E-03<br>± 4.31E-04  |
| Carnitine                        | 8.66E-03<br>± 4.13E-03 | 9.19E-03<br>± 3.04E-03  | 4.59E-03<br>± 1.82E-03 | 5.48E-03<br>± 3.46E-03  | 5.98E-03<br>± 8.71E-04 | 6.42E-03<br>± 1.16E-03  |
| Carnosine                        | 1.83E-04<br>± 3.64E-04 | 2.59E-04<br>± 3.26E-04  | 4.95E-05<br>± 3.02E-05 | 6.61E-05<br>± 4.54E-05  | 1.32E-04<br>± 8.76E-05 | 9.34E-05<br>± 3.81E-05  |
| Choline/<br>Phosphocholine       | 8.10E-04<br>± 2.81E-04 | 7.73E-04<br>± 2.48E-04  | 6.42E-04<br>± 1.21E-04 | 7.78E-04<br>± 3.33E-04  | 6.58E-04<br>± 1.26E-04 | 7.56E-04<br>± 1.34E-04  |
| Citrate <sup>a</sup>             | 1.74E-04<br>± 8.55E-05 | 2.69E-04*<br>± 1.07E-04 | 1.46E-04<br>± 7.50E-05 | 1.53E-04<br>± 1.20E-04  | 1.88E-04<br>± 7.87E-05 | 2.23E-04<br>± 6.82E-05  |
| Creatine/ Creatine<br>phosphate  | 2.80E-02<br>± 1.03E-02 | 2.80E-02<br>± 6.15E-03  | 2.46E-02<br>± 5.06E-03 | 2.53E-02<br>± 1.36E-02  | 2.59E-02<br>± 4.08E-03 | 2.55E-02<br>± 5.13E-03  |
| Creatinine                       | 1.51E-04<br>± 7.20E-05 | 1.28E-04<br>± 5.71E-05  | 1.16E-04<br>± 2.99E-05 | 1.30E-04<br>± 8.07E-05  | 1.56E-04<br>± 4.86E-05 | 1.25E-04<br>± 3.30E-05  |
| Formate <sup>a</sup>             | 5.33E-05<br>± 2.03E-05 | 3.98E-05<br>± 7.12E-06  | 4.82E-05<br>± 1.68E-05 | 3.48E-05*<br>± 8.20E-06 | 4.67E-05<br>± 1.38E-05 | 5.58E-05<br>± 1.11E-05  |
| Fumarate                         | 4.53E-05<br>± 1.85E-05 | 4.30E-05<br>± 1.57E-05  | 4.34E-05<br>± 2.42E-05 | 3.79E-05<br>± 3.05E-05  | 6.19E-05<br>± 1.79E-05 | 5.75E-05<br>± 2.20E-05  |
| GTP                              | 3.53E-05<br>± 1.77E-05 | 3.29E-05<br>± 1.05E-05  | 3.37E-05<br>± 1.16E-05 | 3.57E-05<br>± 1.87E-05  | 3.58E-05<br>± 9.98E-06 | 3.49E-05<br>± 9.17E-06  |
| Glucose                          | 1.52E-03<br>± 5.24E-04 | 1.45E-03<br>± 4.53E-04  | 1.22E-03<br>± 2.77E-04 | 1.37E-03<br>± 7.61E-04  | 1.78E-03<br>± 3.04E-04 | 1.67E-03<br>± 6.04E-04  |
| Glucose-1-phosphate <sup>a</sup> | 6.29E-04<br>± 2.65E-04 | 5.22E-04<br>± 2.01E-04  | 4.97E-04<br>± 1.45E-04 | 4.61E-04<br>± 3.15E-04  | 7.00E-04<br>± 2.14E-04 | 4.80E-04*<br>± 2.71E-04 |

|                                     |                        |                          |                        |                         |                        |                          |
|-------------------------------------|------------------------|--------------------------|------------------------|-------------------------|------------------------|--------------------------|
| Glucose-6-phosphate <sup>a</sup>    | 2.90E-03<br>± 1.21E-03 | 1.57E-03**<br>± 7.25E-04 | 2.69E-03<br>± 6.31E-04 | 1.89E-03<br>± 1.20E-03  | 3.13E-03<br>± 1.05E-03 | 2.24E-03<br>± 9.70E-04   |
| Glutamate                           | 4.10E-04<br>± 2.26E-04 | 5.19E-04<br>± 1.73E-04   | 4.80E-04<br>± 1.69E-04 | 6.11E-04<br>± 3.28E-04  | 3.83E-04<br>± 9.56E-05 | 4.83E-04<br>± 2.42E-04   |
| Glutamine                           | 4.01E-03<br>± 1.85E-03 | 3.86E-03<br>± 2.51E-03   | 3.53E-03<br>± 1.51E-03 | 4.60E-03<br>± 3.03E-03  | 5.11E-03<br>± 1.83E-03 | 5.17E-03<br>± 1.51E-03   |
| Glutathione <sup>a</sup>            | 1.72E-04<br>± 1.03E-04 | 2.79E-04*<br>± 1.26E-04  | 2.20E-04<br>± 6.60E-05 | 2.52E-04<br>± 1.29E-04  | 2.30E-04<br>± 9.64E-05 | 3.13E-04<br>± 1.59E-04   |
| Glycerophosphocholine <sup>a</sup>  | 3.13E-04<br>± 1.13E-04 | 7.71E-05**<br>± 2.43E-05 | 3.81E-04<br>± 1.89E-04 | 5.67E-04<br>± 2.97E-04  | 3.98E-04<br>± 1.65E-04 | 5.45E-04<br>± 1.82E-04   |
| Glycine <sup>a</sup>                | 3.48E-03<br>± 1.73E-03 | 1.90E-03*<br>± 5.35E-04  | 2.84E-03<br>± 7.71E-04 | 1.87E-03*<br>± 1.31E-03 | 2.24E-03<br>± 4.39E-04 | 1.76E-03<br>± 7.04E-04   |
| Histidine                           | 7.53E-06<br>± 2.96E-06 | 6.02E-06<br>± 2.40E-06   | 3.06E-06<br>± 1.03E-06 | 3.77E-06<br>± 2.33E-06  | 5.40E-06<br>± 2.01E-06 | 4.20E-06<br>± 1.96E-06   |
| Homocysteine                        | 1.47E-03<br>± 8.12E-04 | 1.36E-03<br>± 5.47E-04   | 1.22E-03<br>± 4.30E-04 | 1.41E-03<br>± 6.20E-04  | 1.29E-03<br>± 3.50E-04 | 1.41E-03<br>± 4.36E-04   |
| IMP <sup>a</sup>                    | 2.46E-03<br>± 1.05E-03 | 1.89E-03<br>± 7.44E-04   | 1.46E-03<br>± 6.49E-04 | 1.70E-03<br>± 8.59E-04  | 2.45E-03<br>± 7.02E-04 | 1.72E-03*<br>± 7.69E-04  |
| Inosine                             | 1.78E-04<br>± 8.73E-05 | 1.27E-04<br>± 5.61E-05   | 9.23E-05<br>± 4.47E-05 | 9.90E-05<br>± 7.30E-05  | 1.59E-04<br>± 6.48E-05 | 1.39E-04<br>± 8.86E-05   |
| Isoleucine <sup>a</sup>             | 9.29E-05<br>± 3.88E-05 | 7.76E-05<br>± 2.02E-05   | 8.58E-05<br>± 2.36E-05 | 8.18E-05<br>± 4.78E-05  | 1.09E-04<br>± 1.35E-05 | 9.05E-05*<br>± 2.47E-05  |
| Lactate                             | 4.50E-02<br>± 1.83E-02 | 4.12E-02<br>± 1.11E-02   | 3.87E-02<br>± 3.96E-03 | 4.12E-02<br>± 1.55E-02  | 4.92E-02<br>± 7.93E-03 | 4.43E-02<br>± 1.02E-02   |
| Leucine <sup>a</sup>                | 1.40E-04<br>± 5.55E-05 | 1.12E-04<br>± 2.55E-05   | 1.27E-04<br>± 3.67E-05 | 1.17E-04<br>± 5.31E-05  | 1.64E-04<br>± 2.20E-05 | 1.34E-04*<br>± 3.11E-05  |
| Malonate                            | 5.48E-03<br>± 2.14E-03 | 5.72E-03<br>± 2.33E-03   | 2.93E-03<br>± 1.14E-03 | 3.75E-03<br>± 1.71E-03  | 5.11E-03<br>± 1.68E-03 | 5.85E-03<br>± 1.90E-03   |
| Methylmalonate                      | 3.02E-04<br>± 1.67E-04 | 2.70E-04<br>± 6.69E-05   | 2.57E-04<br>± 2.62E-05 | 2.68E-04<br>± 9.76E-05  | 3.16E-04<br>± 4.53E-05 | 2.85E-04<br>± 6.91E-05   |
| Myo-Inositol                        | 1.21E-03<br>± 7.57E-04 | 1.69E-03<br>± 6.59E-04   | 1.25E-03<br>± 7.87E-04 | 1.58E-03<br>± 9.12E-04  | 1.15E-03<br>± 7.34E-04 | 1.29E-03<br>± 8.69E-04   |
| NAD <sup>+</sup> /NADP <sup>+</sup> | 1.16E-04<br>± 6.46E-05 | 8.57E-05<br>± 2.90E-05   | 1.27E-04<br>± 5.27E-05 | 1.00E-04<br>± 5.21E-05  | 1.19E-04<br>± 3.17E-05 | 1.14E-04<br>± 5.84E-05   |
| Nicotinurate                        | 1.44E-04<br>± 5.72E-05 | 1.26E-04<br>± 2.96E-05   | 1.00E-04<br>± 3.06E-05 | 1.16E-04<br>± 4.09E-05  | 1.42E-04<br>± 3.98E-05 | 1.19E-04<br>± 3.22E-05   |
| Phenylalanine <sup>a</sup>          | 4.90E-05<br>± 1.62E-05 | 3.86E-05<br>± 1.07E-05   | 4.39E-05<br>± 9.47E-06 | 3.46E-05<br>± 1.34E-05  | 5.34E-05<br>± 8.22E-06 | 3.97E-05**<br>± 8.62E-06 |
| Proline                             | 2.42E-04<br>± 1.08E-04 | 2.73E-04<br>± 9.73E-05   | 2.62E-04<br>± 8.01E-05 | 3.32E-04<br>± 1.78E-04  | 2.52E-04<br>± 5.58E-05 | 3.24E-04<br>± 1.68E-04   |
| Pyruvate                            | 2.04E-04<br>± 1.13E-04 | 2.10E-04<br>± 1.43E-04   | 1.65E-04<br>± 5.75E-05 | 1.97E-04<br>± 9.99E-05  | 2.70E-04<br>± 7.93E-05 | 2.37E-04<br>± 1.08E-04   |
| Riboflavin                          | 1.42E-05<br>± 4.41E-06 | 1.28E-05<br>± 5.83E-06   | 1.71E-05<br>± 5.87E-06 | 1.93E-05<br>± 9.60E-06  | 1.59E-05<br>± 3.76E-06 | 1.60E-05<br>± 6.08E-06   |
| Succinate                           | 1.01E-03<br>± 3.87E-04 | 1.01E-03<br>± 3.72E-04   | 6.67E-04<br>± 3.30E-04 | 6.43E-04<br>± 3.80E-04  | 1.19E-03<br>± 4.14E-04 | 1.08E-03<br>± 3.87E-04   |
| Taurine <sup>a</sup>                | 5.35E-03<br>± 3.30E-03 | 2.96E-03*<br>± 1.13E-03  | 6.32E-03<br>± 2.82E-03 | 3.88E-03*<br>± 2.35E-03 | 1.44E-02<br>± 4.40E-03 | 8.77E-03**<br>± 2.02E-03 |
| Tyrosine <sup>a</sup>               | 5.50E-05<br>± 2.65E-05 | 3.52E-05*<br>± 1.34E-05  | 5.04E-05<br>± 1.68E-05 | 3.83E-05<br>± 1.55E-05  | 6.26E-05<br>± 1.60E-05 | 4.59E-05*<br>± 1.17E-05  |

|                     |                        |                        |                        |                        |                        |                         |
|---------------------|------------------------|------------------------|------------------------|------------------------|------------------------|-------------------------|
| UDP-glucose         | 3.22E-05<br>± 2.13E-05 | 3.14E-05<br>± 1.11E-05 | 4.02E-05<br>± 1.20E-05 | 3.47E-05<br>± 2.26E-05 | 3.66E-05<br>± 1.10E-05 | 3.59E-05<br>± 2.15E-05  |
| Uridine             | 1.94E-05<br>± 6.83E-06 | 1.54E-05<br>± 8.41E-06 | 1.53E-05<br>± 5.28E-06 | 1.15E-05<br>± 6.99E-06 | 1.89E-05<br>± 4.49E-06 | 1.48E-05<br>± 5.91E-06  |
| Valine <sup>a</sup> | 2.13E-04<br>± 9.95E-05 | 1.48E-04<br>± 3.51E-05 | 1.95E-04<br>± 5.68E-05 | 1.86E-04<br>± 1.07E-04 | 2.25E-04<br>± 3.97E-05 | 1.87E-04*<br>± 3.74E-05 |
| Xanthine            | 5.83E-05<br>± 5.44E-05 | 2.63E-05<br>± 2.33E-05 | 1.85E-05<br>± 6.97E-06 | 2.59E-05<br>± 3.26E-05 | 1.56E-05<br>± 5.50E-06 | 3.66E-05<br>± 5.63E-05  |

---

Key: (a) metabolites with significant differences between growth and restricted groups in at least one breed; (\*)  $p < 0.05$  when compared with growth groups of the same breed; (\*\*)  $p < 0.01$  when compared with growth groups of the same breed.

**Supplementary Table S2.** PCA loadings values of principal component 1 (p[1]) and principal component 2 (p[2]) of muscle from Merino growth and restricted groups (see scores in Figure 2B). Highlighted values are the more representatives for the group clustering.

| metabolite                  | p[1]       | p[2]        |
|-----------------------------|------------|-------------|
| choline/phosphocholine      | 0,0934444  | -0,00916684 |
| lactate                     | 0,187801   | -0,0257329  |
| riboflavin                  | 0,108283   | -0,0279286  |
| homocysteine                | 0,13865    | -0,0281437  |
| GTP                         | 0,161932   | -0,0284619  |
| adenine                     | 0,153523   | -0,0293082  |
| adenosine                   | 0,0910446  | -0,0313269  |
| isoleucine                  | 0,17947    | -0,0335238  |
| methylmalonate              | 0,187916   | -0,0373872  |
| histidine                   | 0,145532   | -0,0400434  |
| glucose                     | 0,16066    | -0,0483827  |
| leucine                     | 0,176612   | -0,0493796  |
| glucose-1-phosphate         | 0,164189   | -0,0517669  |
| beta-alanine                | 0,140296   | -0,0566436  |
| phenylalanine               | 0,176972   | -0,0739192  |
| IMP                         | 0,162193   | -0,0880994  |
| tyrosine                    | 0,163835   | -0,0916036  |
| inosine                     | 0,13526    | -0,0961437  |
| creatine                    | 0,0984559  | -0,112648   |
| valine                      | 0,171368   | -0,116997   |
| taurine                     | 0,160134   | -0,160068   |
| anserine                    | 0,0872286  | -0,170245   |
| NAD+/NADP+                  | 0,14135    | -0,187977   |
| formate                     | 0,128394   | -0,189047   |
| glycine                     | 0,143278   | -0,19155    |
| xanthine                    | -0,015431  | -0,20734    |
| glucose-6-phosphate         | 0,123557   | -0,305008   |
| creatine/creatine phosphate | 0,18423    | 0,00272127  |
| nicotinurate                | 0,174855   | 0,0223421   |
| aspartate                   | 0,167016   | 0,0305508   |
| UDP-glucose                 | 0,160648   | 0,0329277   |
| acetate                     | 0,158195   | 0,0358494   |
| alanine                     | 0,170251   | 0,036475    |
| uridine                     | 0,133736   | 0,0596227   |
| pyruvate                    | 0,106272   | 0,0650886   |
| carnitine                   | 0,169322   | 0,0885765   |
| fumarate                    | 0,170695   | 0,0933712   |
| ADP/AMP/ATP                 | 0,135175   | 0,106753    |
| proline                     | 0,15098    | 0,110592    |
| succinate                   | 0,156269   | 0,119165    |
| betaine                     | 0,048716   | 0,122313    |
| malonate                    | 0,150058   | 0,131919    |
| 3-methylhistidine           | 0,0158208  | 0,136634    |
| carnosine                   | 0,00697562 | 0,164795    |
| glutamate                   | 0,157805   | 0,179145    |
| glutamine                   | 0,0984383  | 0,184886    |
| glutathione                 | 0,0993436  | 0,244599    |
| acetyl-L-carnitine          | 0,080261   | 0,261162    |
| myo-inositol                | 0,109134   | 0,261164    |
| citrate                     | 0,118022   | 0,31952     |
| glycerophosphocholine       | 0,020397   | 0,338363    |

**Supplementary Table S3.** Identified metabolites in liver of Merino, Dorper and Damara sheep breeds (growth and restricted groups). Average concentration (mmol/ g tissue) and standard deviation are shown for each experimental group.

|                                                        | Merino                 |                          | Dorper                 |                         | Damara                 |                          |
|--------------------------------------------------------|------------------------|--------------------------|------------------------|-------------------------|------------------------|--------------------------|
|                                                        | growth                 | restricted               | growth                 | restricted              | growth                 | restricted               |
| 3-Hydroxybutyrate <sup>a</sup>                         | 3.30E-04<br>± 1.00E-04 | 4.67E-04*<br>± 1.40E-04  | 2.35E-04<br>± 9.97E-05 | 3.18E-04<br>± 1.40E-04  | 2.91E-04<br>± 7.93E-05 | 2.67E-04<br>± 1.38E-04   |
| Methylhistidine                                        | 1.30E-04<br>± 1.39E-04 | 1.05E-04<br>± 1.01E-04   | 1.85E-04<br>± 1.88E-04 | 1.01E-04<br>± 1.03E-04  | 5.79E-05<br>± 6.53E-05 | 6.70E-05<br>± 7.89E-05   |
| ADP AMP ATP                                            | 8.00E-04<br>± 3.30E-04 | 9.49E-04<br>± 3.27E-04   | 7.20E-04<br>± 3.51E-04 | 7.56E-04<br>± 2.87E-04  | 9.19E-04<br>± 1.74E-04 | 6.90E-04<br>± 3.80E-04   |
| Acetate <sup>a</sup>                                   | 5.89E-04<br>± 1.26E-04 | 8.29E-04**<br>± 1.72E-04 | 4.94E-04<br>± 2.32E-04 | 5.77E-04<br>± 2.47E-04  | 6.08E-04<br>± 1.31E-04 | 4.32E-04*<br>± 2.31E-04  |
| Adenine <sup>a</sup>                                   | 3.30E-04<br>± 1.46E-04 | 3.03E-04<br>± 1.63E-04   | 1.64E-04<br>± 9.73E-05 | 1.87E-04<br>± 1.02E-04  | 3.03E-04<br>± 4.54E-05 | 1.63E-04**<br>± 1.19E-04 |
| Adenosylhomocysteine                                   | 4.41E-05<br>± 2.52E-05 | 5.45E-05<br>± 2.36E-05   | 2.67E-05<br>± 2.02E-05 | 4.36E-05<br>± 2.24E-05  | 4.75E-05<br>± 1.94E-05 | 4.17E-05<br>± 2.20E-05   |
| Alanine <sup>a</sup>                                   | 1.97E-03<br>± 4.86E-04 | 1.38E-03**<br>± 4.18E-04 | 1.78E-03<br>± 8.76E-04 | 1.37E-03<br>± 4.57E-04  | 2.38E-03<br>± 2.77E-04 | 1.53E-03**<br>± 7.19E-04 |
| Ascorbate <sup>a</sup>                                 | 1.24E-03<br>± 3.70E-04 | 7.67E-04**<br>± 3.53E-04 | 9.23E-04<br>± 4.95E-04 | 7.21E-04<br>± 3.23E-04  | 1.15E-03<br>± 2.52E-04 | 8.22E-04*<br>± 4.12E-04  |
| Aspartate                                              | 8.23E-04<br>± 1.34E-04 | 9.19E-04<br>± 3.37E-04   | 7.53E-04<br>± 3.23E-04 | 9.52E-04<br>± 3.94E-04  | 1.17E-03<br>± 2.95E-04 | 9.09E-04<br>± 4.43E-04   |
| Benzoate                                               | 2.37E-05<br>± 1.65E-05 | 2.30E-05<br>± 1.53E-05   | 1.35E-05<br>± 1.59E-05 | 1.21E-05<br>± 9.44E-06  | 2.67E-05<br>± 1.46E-05 | 1.93E-05<br>± 8.36E-06   |
| Betaine                                                | 4.22E-04<br>± 8.76E-05 | 4.73E-04<br>± 8.99E-05   | 3.07E-04<br>± 2.03E-04 | 4.22E-04<br>± 1.97E-04  | 3.55E-04<br>± 1.54E-04 | 3.18E-04<br>± 1.84E-04   |
| Carnitine <sup>a</sup>                                 | 5.68E-04<br>± 3.16E-04 | 5.77E-04<br>± 3.47E-04   | 6.40E-04<br>± 3.45E-04 | 9.74E-04*<br>± 4.27E-04 | 7.03E-04<br>± 2.61E-04 | 7.08E-04<br>± 3.79E-04   |
| Carnosine                                              | 3.24E-05<br>± 2.48E-05 | 4.80E-05<br>± 1.72E-05   | 4.11E-05<br>± 2.34E-05 | 3.57E-05<br>± 3.56E-05  | 5.20E-05<br>± 6.45E-05 | 2.74E-05<br>± 1.92E-05   |
| Choline/ Acetylcholine/<br>Phosphocholine <sup>a</sup> | 5.97E-04<br>± 3.04E-04 | 8.77E-04<br>± 6.55E-04   | 4.55E-04<br>± 3.61E-04 | 5.39E-04<br>± 2.70E-04  | 6.21E-04<br>± 2.58E-04 | 3.43E-04*<br>± 2.27E-04  |
| Citrate <sup>a</sup>                                   | 3.64E-04<br>± 1.22E-04 | 2.57E-04<br>± 1.34E-04   | 3.23E-04<br>± 1.36E-04 | 2.49E-04<br>± 1.08E-04  | 4.87E-04<br>± 1.21E-04 | 2.92E-04**<br>± 1.83E-04 |
| Creatine/<br>Creatine phosphate <sup>a</sup>           | 1.66E-03<br>± 5.20E-04 | 2.60E-03**<br>± 7.24E-04 | 1.47E-03<br>± 6.77E-04 | 1.76E-03<br>± 8.34E-04  | 1.59E-03<br>± 3.28E-04 | 1.68E-03<br>± 1.04E-03   |
| Creatinine                                             | 2.62E-04<br>± 2.11E-04 | 2.59E-04<br>± 5.52E-05   | 2.33E-04<br>± 1.61E-04 | 2.33E-04<br>± 1.35E-04  | 2.24E-04<br>± 6.99E-05 | 2.12E-04<br>± 1.23E-04   |
| Formate <sup>a</sup>                                   | 1.21E-04<br>± 7.59E-05 | 1.34E-04<br>± 5.55E-05   | 3.89E-05<br>± 3.40E-05 | 4.99E-05<br>± 5.04E-05  | 1.21E-04<br>± 5.60E-05 | 4.80E-05**<br>± 2.52E-05 |
| Fumarate                                               | 1.07E-04<br>± 4.85E-05 | 1.26E-04<br>± 6.44E-05   | 8.43E-05<br>± 3.99E-05 | 1.20E-04<br>± 5.73E-05  | 1.06E-04<br>± 3.06E-05 | 1.11E-04<br>± 7.94E-05   |
| Glucose                                                | 8.68E-02<br>± 1.81E-02 | 7.76E-02<br>± 1.53E-02   | 8.03E-02<br>± 3.70E-02 | 7.12E-02 ±<br>2.63E-02  | 9.10E-02<br>± 1.51E-02 | 7.71E-02<br>± 3.11E-02   |
| Glutamate                                              | 3.98E-03<br>± 9.35E-04 | 3.38E-03<br>± 1.20E-03   | 4.16E-03<br>± 1.94E-03 | 3.90E-03<br>± 1.73E-03  | 3.87E-03<br>± 8.97E-04 | 3.74E-03<br>± 1.77E-03   |
| Glutathione <sup>a</sup>                               | 2.53E-03<br>± 7.38E-04 | 1.20E-03**<br>± 4.27E-04 | 2.24E-03<br>± 1.36E-03 | 1.51E-03<br>± 6.41E-04  | 2.54E-03<br>± 4.75E-04 | 1.93E-03<br>± 1.26E-03   |



|                                              |                        |                         |                        |                          |                        |                          |
|----------------------------------------------|------------------------|-------------------------|------------------------|--------------------------|------------------------|--------------------------|
| Glycerophosphocholine                        | 1.15E-02<br>± 1.48E-03 | 1.15E-02<br>± 2.13E-03  | 7.36E-03<br>± 2.92E-03 | 8.79E-03<br>± 3.12E-03   | 9.40E-03<br>± 1.00E-03 | 8.40E-03<br>± 2.85E-03   |
| Glycine                                      | 2.98E-03<br>± 2.28E-03 | 5.04E-03<br>± 3.07E-03  | 2.95E-03<br>± 2.62E-03 | 3.52E-03<br>± 2.60E-03   | 2.51E-03<br>± 2.20E-03 | 3.23E-03<br>± 2.13E-03   |
| Histamine                                    | 7.22E-05<br>± 4.98E-05 | 7.17E-05<br>± 5.11E-05  | 8.66E-05<br>± 1.28E-04 | 5.94E-05<br>± 6.40E-05   | 7.67E-05<br>1.05E-04   | 4.48E-05<br>± 6.62E-05   |
| Histidine                                    | 1.76E-05<br>± 1.77E-05 | 3.90E-05<br>± 6.67E-05  | 4.60E-05<br>± 6.54E-05 | 6.57E-05<br>± 8.10E-05   | 4.27E-05<br>± 4.42E-05 | 2.96E-05<br>± 2.65E-05   |
| Inosine                                      | 1.38E-03<br>± 3.39E-04 | 1.15E-03<br>± 5.63E-04  | 1.04E-03<br>± 5.13E-04 | 1.16E-03<br>± 4.13E-04   | 1.15E-03<br>± 1.61E-04 | 1.00E-03<br>± 4.30E-04   |
| Isoleucine                                   | 2.16E-04<br>± 3.05E-05 | 2.35E-04<br>± 4.58E-05  | 1.97E-04<br>± 9.67E-05 | 2.05E-04<br>± 7.34E-05   | 2.17E-04<br>± 3.94E-05 | 2.01E-04<br>± 9.25E-05   |
| Lactate <sup>a</sup>                         | 2.33E-02<br>± 4.36E-03 | 1.97E-02*<br>± 2.99E-03 | 1.65E-02<br>± 7.78E-03 | 1.50E-02<br>± 5.30E-03   | 2.10E-02<br>± 2.70E-03 | 1.48E-02**<br>± 5.34E-03 |
| Leucine                                      | 5.15E-04<br>± 1.33E-04 | 5.56E-04<br>± 1.40E-04  | 3.98E-04<br>± 1.92E-04 | 4.63E-04<br>± 1.47E-04   | 5.15E-04<br>± 7.97E-05 | 4.53E-04<br>± 1.86E-04   |
| Lysine                                       | 1.84E-04<br>± 8.02E-05 | 2.01E-04<br>± 8.48E-05  | 2.27E-04<br>± 9.18E-05 | 2.33E-04<br>± 1.03E-04   | 2.77E-04<br>± 7.91E-05 | 2.30E-04<br>± 1.05E-04   |
| myo-Inositol                                 | 1.79E-03<br>± 8.03E-04 | 2.39E-03<br>± 6.31E-04  | 1.50E-03<br>± 6.14E-04 | 1.57E-03<br>± 5.63E-04   | 1.61E-03<br>± 6.65E-04 | 1.34E-03<br>± 6.57E-04   |
| NAD <sup>+</sup> / NADP <sup>+</sup> / NADPH | 3.39E-04<br>± 7.57E-05 | 3.27E-04<br>± 8.69E-05  | 2.22E-04<br>± 1.10E-04 | 2.43E-04<br>± 9.46E-05   | 3.08E-04<br>± 3.12E-05 | 2.58E-04<br>± 1.28E-04   |
| Nicotinurate                                 | 4.05E-04<br>± 1.20E-04 | 3.85E-04<br>± 2.04E-04  | 3.64E-04<br>± 2.19E-04 | 3.14E-04<br>± 1.42E-04   | 3.37E-04<br>± 6.96E-05 | 2.70E-04<br>± 1.15E-04   |
| Phenylalanine                                | 9.77E-05<br>± 2.70E-05 | 9.26E-05<br>± 1.97E-05  | 7.96E-05<br>± 3.84E-05 | 8.75E-05<br>± 3.51E-05   | 8.81E-05<br>± 2.65E-05 | 8.19E-05<br>± 3.41E-05   |
| Pyruvate                                     | 1.01E-04<br>± 5.32E-05 | 1.22E-04<br>± 6.77E-05  | 8.44E-05<br>± 7.04E-05 | 1.09E-04<br>± 7.39E-05   | 1.02E-04<br>± 7.93E-05 | 6.27E-05<br>± 5.67E-05   |
| Sarcosine <sup>a</sup>                       | 2.50E-05<br>± 1.06E-05 | 6.57E-05*<br>± 4.68E-05 | 1.91E-05<br>± 9.89E-06 | 4.99E-05**<br>± 3.33E-05 | 2.54E-05<br>± 9.92E-06 | 2.84E-05<br>± 1.94E-05   |
| Succinate <sup>a</sup>                       | 1.94E-03<br>± 7.03E-04 | 1.10E-03*<br>± 7.40E-04 | 1.40E-03<br>± 9.42E-04 | 1.01E-03<br>± 5.22E-04   | 1.58E-03<br>± 6.35E-04 | 1.35E-03<br>± 6.22E-04   |
| Taurine                                      | 3.14E-03<br>± 1.43E-03 | 2.90E-04<br>± 5.48E-04  | 2.11E-03<br>± 6.67E-04 | 2.05E-03<br>± 1.33E-03   | 2.25E-03<br>± 1.36E-03 | 2.46E-03<br>± 1.13E-03   |
| Tyrosine                                     | 1.06E-04<br>± 2.14E-05 | 1.13E-04<br>± 1.97E-05  | 9.53E-05<br>± 4.17E-05 | 1.07E-04<br>± 3.94E-05   | 1.18E-04<br>± 1.97E-05 | 9.84E-05<br>± 4.55E-05   |
| UDP-glucose/<br>UDP-glucuronate <sup>a</sup> | 2.37E-04<br>± 6.03E-05 | 1.69E-04*<br>± 6.06E-05 | 1.79E-04<br>± 8.35E-05 | 1.99E-04<br>± 8.58E-05   | 1.82E-04<br>± 4.43E-05 | 1.35E-04*<br>± 5.16E-05  |
| UMP                                          | 2.16E-04<br>± 6.39E-05 | 1.99E-04<br>± 9.61E-05  | 1.73E-04<br>± 1.20E-04 | 2.06E-04<br>± 1.06E-04   | 2.37E-04<br>± 6.70E-05 | 1.91E-04<br>± 1.19E-04   |
| Uridine                                      | 2.00E-04<br>± 8.53E-05 | 1.89E-04<br>± 7.52E-05  | 1.73E-04<br>± 9.29E-05 | 2.16E-04<br>± 9.06E-05   | 2.52E-04<br>± 4.53E-05 | 1.79E-04<br>± 1.47E-04   |
| Valine                                       | 2.85E-04<br>± 4.72E-05 | 2.68E-04<br>± 5.60E-05  | 2.89E-04<br>± 1.49E-04 | 3.24E-04<br>± 1.10E-04   | 2.84E-04<br>± 7.18E-05 | 2.92E-04<br>± 1.45E-04   |
| Xanthine                                     | 9.03E-05<br>± 1.28E-04 | 5.88E-05<br>± 6.43E-05  | 1.07E-04<br>± 2.08E-04 | 1.94E-04<br>± 2.51E-04   | 1.51E-04<br>± 1.73E-04 | 1.10E-04<br>± 2.10E-04   |
| Xanthosine                                   | 5.53E-05<br>± 1.95E-05 | 6.54E-05<br>± 1.56E-05  | 3.13E-05<br>± 1.46E-05 | 4.47E-05<br>± 1.85E-05   | 3.99E-05<br>± 9.11E-06 | 3.73E-05<br>± 1.57E-05   |

Key: (a) metabolites with significant differences between growth and restricted groups in at least one breed; (\*)  $p < 0.05$  when compared with growth groups of the same breed; (\*\*)  $p < 0.01$  when compared with growth groups of the same breed.

**Supplementary Table S4.** PCA loadings values of principal component 1 (p[1]) and principal component 2 (p[2]) of liver from all experimental groups (see scores in Figure 4A). Highlighted values are the more representatives for the group clustering.

| metabolite                           | p[1]      | p[2]        |
|--------------------------------------|-----------|-------------|
| lysine                               | 0,127616  | -0,00836563 |
| tyrosine                             | 0,217153  | -0,0101978  |
| leucine                              | 0,213215  | -0,0182982  |
| fumarate                             | 0,16816   | -0,0194202  |
| isoleucine                           | 0,218857  | -0,0270153  |
| valine                               | 0,193653  | -0,0282933  |
| myo-inositol                         | 0,126898  | -0,0344818  |
| aspartate                            | 0,175622  | -0,0405529  |
| betaine                              | 0,182334  | -0,0429109  |
| carnitine                            | 0,0864109 | -0,0503634  |
| glycerophosphocholine                | 0,199769  | -0,0594424  |
| 3-hydroxybutyrate                    | 0,17255   | -0,0637507  |
| phenylalanine                        | 0,195149  | -0,0656461  |
| creatine/creatine phosphate          | 0,150869  | -0,0656852  |
| sarcosine                            | 0,0993925 | -0,117427   |
| NAD+/NADP+/NADPH                     | 0,15416   | -0,123242   |
| acetate                              | 0,181122  | -0,124148   |
| histamine                            | 0,0689646 | -0,162512   |
| taurine                              | 0,0889907 | -0,165381   |
| xanthosine                           | 0,13541   | -0,182926   |
| carnosine                            | 0,0751018 | -0,186254   |
| formate                              | 0,11196   | -0,254873   |
| pyruvate                             | 0,10112   | -0,257031   |
| adenosylhomocysteine                 | 0,0905311 | -0,265901   |
| benzoate                             | 0,0699395 | -0,303525   |
| glycine                              | 0,0717862 | -0,344065   |
| choline/acetylcholine/phosphocholine | 0,126998  | 0,00421237  |
| histidine                            | 0,0423974 | 0,0065039   |
| ADP/AMP/ATP                          | 0,160462  | 0,0274156   |
| methylhistidine                      | 0,0542767 | 0,0421994   |
| glutamate                            | 0,185099  | 0,0518193   |
| adenine                              | 0,13848   | 0,0601666   |
| UDP-glucose/UDP-glucuronate          | 0,153788  | 0,0665798   |
| uridine                              | 0,154128  | 0,0822441   |
| UMP                                  | 0,142359  | 0,0970162   |
| creatine                             | 0,109538  | 0,105426    |
| ascorbate                            | 0,136358  | 0,118421    |
| xanthine                             | 0,0749608 | 0,134583    |
| nicotinurate                         | 0,163784  | 0,140839    |
| lactate                              | 0,196794  | 0,147192    |
| inosine                              | 0,177502  | 0,154198    |
| citrate                              | 0,133787  | 0,158362    |
| glucose                              | 0,18902   | 0,164965    |
| alanine                              | 0,171358  | 0,208244    |
| glutathione                          | 0,143614  | 0,219198    |
| succinate                            | 0,102549  | 0,337444    |

**Supplementary Table S5.** PCA loadings values of principal component 1 (p[1]) and principal component 2 (p[2]) of liver from the three restricted groups (see scores in Figure 4B). Highlighted values are the more representatives for the group clustering.

| metabolite                           | p[1]      | p[2]         |
|--------------------------------------|-----------|--------------|
| isoleucine                           | 0,208316  | -0,000775746 |
| phenylalanine                        | 0,188558  | -0,00329607  |
| nicotinurate                         | 0,143321  | -0,00548825  |
| lactate                              | 0,190172  | -0,00862534  |
| creatine/creatine phosphate          | 0,170103  | -0,0123637   |
| UDP-glucose/UDP-glucuronate          | 0,14332   | -0,0217326   |
| tyrosine                             | 0,206108  | -0,0388418   |
| lysine                               | 0,13228   | -0,0388863   |
| creatine                             | 0,138003  | -0,0522449   |
| histidine                            | 0,0606518 | -0,0612253   |
| aspartate                            | 0,17443   | -0,071565    |
| glutamate                            | 0,17281   | -0,0871191   |
| ascorbate                            | 0,15292   | -0,0905637   |
| citrate                              | 0,158871  | -0,103218    |
| fumarate                             | 0,161439  | -0,107697    |
| valine                               | 0,185765  | -0,115555    |
| UMP                                  | 0,148757  | -0,121438    |
| carnitine                            | 0,116598  | -0,131282    |
| glutathione                          | 0,142582  | -0,154829    |
| glucose                              | 0,18041   | -0,167011    |
| uridine                              | 0,145556  | -0,174022    |
| inosine                              | 0,146805  | -0,18577     |
| alanine                              | 0,168406  | -0,205698    |
| xanthine                             | 0,0942055 | -0,238436    |
| succinate                            | 0,0769011 | -0,279004    |
| ADP/AMP/ATP                          | 0,180266  | 0,00599214   |
| leucine                              | 0,198651  | 0,0248222    |
| NAD+/NADP+/NADPH                     | 0,158748  | 0,028534     |
| glycerophosphocholine                | 0,18985   | 0,060954     |
| betaine                              | 0,191049  | 0,0765777    |
| adenine                              | 0,121361  | 0,0798769    |
| myo-inositol                         | 0,136747  | 0,0845144    |
| methylhistidine                      | 0,046819  | 0,0851829    |
| sarcosine                            | 0,120288  | 0,12591      |
| choline/acetylcholine/phosphocholine | 0,117606  | 0,126589     |
| 3-hydroxybutyrate                    | 0,18354   | 0,131976     |
| histamine                            | 0,0530351 | 0,145616     |
| acetate                              | 0,172174  | 0,152669     |
| carnosine                            | 0,12277   | 0,184341     |
| xanthosine                           | 0,15219   | 0,207178     |
| taurine                              | 0,0854165 | 0,228516     |
| pyruvate                             | 0,0859815 | 0,234773     |
| benzoate                             | 0,0707271 | 0,255549     |
| glycine                              | 0,0886229 | 0,263101     |
| adenosylhomocysteine                 | 0,0886352 | 0,274663     |
| formate                              | 0,121623  | 0,296229     |

**Supplementary Table S6.** PCA loadings values of principal component 1 (p[1]) and principal component 2 (p[2]) of liver from Merino control and restricted groups (see scores in Figure 4C). Highlighted values are the more representatives for the group clustering.

| metabolite                           | p[1]        | p[2]       |
|--------------------------------------|-------------|------------|
| xanthine                             | -0,130986   | -0,0215009 |
| phenylalanine                        | 0,227905    | -0,0283117 |
| UMP                                  | 0,127628    | -0,0521813 |
| uridine                              | 0,0977984   | -0,0590317 |
| adenine                              | 0,0628757   | -0,0592536 |
| methylhistidine                      | 0,141309    | -0,0787875 |
| glutamate                            | 0,153095    | -0,097344  |
| nicotinurate                         | 0,251954    | -0,0973478 |
| ascorbate                            | -0,0910994  | -0,0998218 |
| UDP-glucose/UDP-glucuronate          | 0,038097    | -0,100275  |
| citrate                              | -0,00360237 | -0,144997  |
| creatine                             | 0,125737    | -0,155774  |
| glutathione                          | -0,00830276 | -0,225313  |
| inosine                              | 0,051935    | -0,228885  |
| alanine                              | 0,119323    | -0,257885  |
| glucose                              | 0,0754439   | -0,273554  |
| lactate                              | 0,166109    | -0,287578  |
| succinate                            | 0,075375    | -0,320218  |
| fumarate                             | 0,168831    | 0,00107662 |
| lysine                               | -0,107692   | 0,00221375 |
| glycerophosphocholine                | 0,193145    | 0,0142183  |
| valine                               | 0,233315    | 0,0247463  |
| NAD+/NADP+/NADPH                     | -0,065732   | 0,0299473  |
| leucine                              | 0,256368    | 0,0316425  |
| tyrosine                             | 0,284198    | 0,039383   |
| choline/acetylcholine/phosphocholine | 0,195512    | 0,0450083  |
| taurine                              | 0,0405945   | 0,0504528  |
| betaine                              | 0,288543    | 0,0543983  |
| histidine                            | 0,0189755   | 0,0555584  |
| aspartate                            | 0,200786    | 0,0787987  |
| isoleucine                           | 0,308628    | 0,0831473  |
| 3-hydroxybutyrate                    | 0,224642    | 0,0971955  |
| ADP/AMP/ATP                          | 0,0458819   | 0,115534   |
| xanthosine                           | 0,118581    | 0,119332   |
| pyruvate                             | 0,0877144   | 0,125332   |
| carnitine                            | -0,164151   | 0,131304   |
| sarcosine                            | 0,179643    | 0,135232   |
| histamine                            | 0,0375752   | 0,138799   |
| creatine/creatine phosphate          | -0,0620337  | 0,16219    |
| carnosine                            | 0,0048895   | 0,169906   |
| adenosylhomocysteine                 | 0,0725635   | 0,171096   |
| myo-inositol                         | 0,0228209   | 0,180632   |
| acetate                              | 0,140317    | 0,201524   |
| benzoate                             | -0,00294643 | 0,211504   |
| formate                              | 0,0243885   | 0,227965   |
| glycine                              | 0,077779    | 0,280858   |

**Supplementary Table S7.** PCA loadings values of principal component 1 (p[1]) and principal component 2 (p[2]) of liver from Damara growth and restricted groups (see scores in Figure 4D). Highlighted values are the more representatives for the group clustering.

| metabolite                                 | p[1]      | p[2]        |
|--------------------------------------------|-----------|-------------|
| glycine                                    | 0,0244041 | 0,330112    |
| methylhistidine                            | 0,0395212 | 0,142924    |
| adenosylhomocysteine                       | 0,049878  | 0,225319    |
| carnosine                                  | 0,0571769 | 0,139833    |
| histamine                                  | 0,0649823 | 0,352769    |
| pyruvate                                   | 0,069471  | 0,29267     |
| taurine                                    | 0,0777508 | 0,187248    |
| histidine                                  | 0,0854182 | -0,0733942  |
| sarcosine                                  | 0,089201  | 0,0101228   |
| benzoate                                   | 0,0895776 | 0,308548    |
| succinate                                  | 0,114866  | -0,277505   |
| choline/acetylcholine/phosphocholine       | 0,117652  | -0,172304   |
| myo-inositol                               | 0,117797  | -0,073074   |
| formate                                    | 0,120196  | 0,0919685   |
| betaine                                    | 0,121406  | -0,0799325  |
| creatine                                   | 0,125324  | -0,0839733  |
| nicotinurate                               | 0,126424  | -0,147877   |
| xanthine                                   | 0,127075  | -0,07777    |
| carnitine                                  | 0,138737  | -0,0065273  |
| lysine                                     | 0,146226  | 0,151516    |
| xanthosine                                 | 0,146916  | 0,0853477   |
| UDP-glucose/UDP-glucoronate                | 0,147759  | -0,160506   |
| UMP                                        | 0,154387  | -0,0736292  |
| 3-hydroxybutyrate                          | 0,15474   | -0,105817   |
| adenine                                    | 0,161653  | -0,167643   |
| phenylalanine                              | 0,162582  | 0,154978    |
| fumarate                                   | 0,170056  | 0,0778041   |
| aspartate                                  | 0,170086  | 0,10321     |
| uridine                                    | 0,171311  | -0,0805676  |
| ADP/AMP/ATP                                | 0,172519  | -0,202394   |
| acetate                                    | 0,174108  | -0,072834   |
| creatine/creatine phosphate                | 0,174122  | -0,0683038  |
| citrate                                    | 0,174285  | -0,0359612  |
| glutathione                                | 0,175249  | -0,0786109  |
| valine                                     | 0,175946  | 0,123836    |
| glutamate                                  | 0,177562  | 0,15096     |
| lactate                                    | 0,178027  | -0,11048    |
| alanine                                    | 0,178856  | -0,0699502  |
| ascorbate                                  | 0,179167  | -0,071083   |
| NAD <sup>+</sup> /NADP <sup>+</sup> /NADPH | 0,182011  | 0,106688    |
| glycerophosphocholine                      | 0,186098  | 0,0281151   |
| inosine                                    | 0,190939  | -0,00196768 |
| leucine                                    | 0,191633  | 0,00893044  |
| tyrosine                                   | 0,192082  | 0,0391107   |
| isoleucine                                 | 0,192687  | 0,0726498   |
| glucose                                    | 0,198681  | 0,082695    |

**Supplementary Table S8.** Summary of previous results of the same animals.

Live weight variation (%) between day 0 and day 42: (-) decrease, (+) increase, significant differences ( $p < 0.05$ ) were found for all experimental groups in a comparison of day 42 and day 0, and between the two groups of the same breed at day 42.

Carcass weights (kg) and yields (%): Data shown as mean  $\pm$  standard deviation. Different letters (a,b) in each row for each nutritional treatment indicate significant differences ( $p < 0.05$ ) between breeds. Different letters (A, B, C) indicate significant differences ( $p < 0.05$ ) between nutritional treatments for the same breed: A – Merino, B – Damara, C – Dorper.

Liver weight (g): Data shown as mean  $\pm$  standard deviation. No significant differences ( $p < 0.05$ ) were observed between breeds. Star (\*) indicates significant differences between nutritional treatments ( $p < 0.05$ ).

Meat characteristics (colour, pH, eye muscle/longissimus dorsi muscle dimensions): Data shown as mean  $\pm$  standard deviation. Different letters (a, b, c) in each row indicate significant differences ( $p < 0.05$ ) between breeds, for each parameter (colour and dimensions). Star (\*) indicates significant differences between nutritional treatments ( $p < 0.05$ ). Colour (redness, yellowness and lightness), higher values means redder/yellower/lighter.

Plasma concentrations of leptin and insulin ( $\mu\text{U/ml}$ ): Data shown as means  $\pm$  standard error. No interaction effect of breed and feed restriction was observed. Different letters (a, b) in each row indicate significant differences. Asterisks: (\*) indicates significant differences ( $p < 0.05$ ), (\*\*) indicates significant differences ( $p < 0.001$ ). Leptin: significant differences ( $p < 0.001$ ) were observed between feed restriction and growth groups between day 0 and day 42 in all groups.

Adapted from: Almeida et al. (2013) Trop Anim Health Prod. 45:1305-1311 (Reference No. 7) and Almeida et al. (2016) PlosOne. DOI:10.1371 (Reference No. 13). Shown here for contextual reasons only.

|                             | Merino           |                   | Dorper            |                   | Damara           |                   |
|-----------------------------|------------------|-------------------|-------------------|-------------------|------------------|-------------------|
|                             | Growth<br>+10    | Restricted<br>-14 | Growth<br>+13     | Restricted<br>-12 | Growth<br>+7     | Restricted<br>-12 |
| Live weight variation (%)   |                  |                   |                   |                   |                  |                   |
| Carcass hot weight (kg)     | 14.81±2.18 a     | 11.11±1.10 aA     | 20.17±1.55 b      | 14.90±1.93 bC     | 20.27±3.61 b     | 16.70±3.06 bB     |
| Carcass yield (%)           | 39.11±1.55 a     | 38.02±2.62 a      | 44.53±2.66 b      | 43.30±2.66 b      | 43.89±3.17 b     | 44.64±3.17 b      |
| Liver weight (g)            | 612.85±76.54 *   | 375.40±40.98      | 696.34±94.00 *    | 419.33±95.85      | 637.69±101.80 *  | 470.45±61.57      |
| redness                     | 14.39±0.78 a*    | 16.28±1.03 a      | 14.50±1.54 a      | 15.31±1.05 ab     | 13.88±0.93 a     | 14.11±1.08 b      |
| yellowness                  | 6.15±0.88 a      | 6.06±1.02 a       | 5.97±0.90 a       | 5.84±0.75 a       | 5.64±1.37 a      | 5.57±0.60 a       |
| lightness                   | 42.35±2.47 a     | 41.26±1.12 a      | 40.00±1.41 b      | 40.78±1.89 a      | 38.07±1.76 b     | 37.82±1.74 b      |
| pH                          | 5.79±0.06 a*     | 5.92±0.61 a       | 5.89±0.06 b       | 5.96±0.08 a       | 5.78±0.05 a      | 5.83±0.04 b       |
| Eye area (cm <sup>2</sup> ) | 1065.33±211.90 a | 800.87±159.89 a   | 1569.31±286.45 b* | 1177.07±186.60 b  | 1485.96±241.86 b | 1373.33±246.73 b  |
| muscle diameter (mm)        | 23.08±3.37 a*    | 18.71±3.25 a      | 30.18±4.24 b*     | 24.75±2.67 b      | 29.91±3.97 b     | 27.83±2.89 b      |
| muscle width (mm)           | 57.33±4.23 a     | 53.27±3.28 a      | 64.64±3.63 b*     | 59.17±3.81 b      | 62.00±3.74 ab    | 61.33±5.07 b      |
| Leptin Day 0 (µU/ml)        | 0.501±0.015      | 0.541±0.018 a**   | 0.547±0.032       | 0.533±0.023 a**   | 0.773±0.084      | 0.810±0.088 b**   |
| Leptin Day 42 (µU/ml)       | 0.883±0.057      | 0.638±0.049 a*    | 0.951±0.055       | 0.627±0.048 a*    | 1.084±0.126      | 0.873±0.104 b*    |
| Insulin Day 0 (µU/ml)       | 3.671±0.469      | 2.703±0.271 a**   | 3.463±0.580       | 2.815±0.278 a**   | 7.632±1.259      | 5.828±0.981 b**   |
| Insulin Day 42 (µU/ml)      | 4.223±0.470      | 2.322±0.232 a**   | 4.318±0.348       | 2.067±0.11 a**    | 6.938±0.821      | 3.958±0.468 b**   |
